# Supplementary material for: The SORL1 p.Y1816C variant causes impaired endosomal dimerization and autosomal dominant Alzheimer’s disease
Source: bioRxiv or medRxiv preprint supplement (doi:10.1101/2023.07.09.23292253), 2023-07-13

# Jensen

## Supplementary Table S1

### i3N induction medium (IM)

| ITEM                          | COMPANY                  | IDENTIFIER    | STORAGE CONCENTRATION | FINAL CONCENTRATION |
|-------------------------------|--------------------------|---------------|-----------------------|---------------------|
| DMEM/F12                      | Thermo Fisher Scientific | Cat# 21331046 | basal medium          | basal medium        |
| HEPES                         | Thermo Fisher Scientific | Cat# 15630106 | 1M                    | 15mM                |
| N-2 Supplement                | Thermo Fisher Scientific | Cat# 17502048 | 100X                  | 1X                  |
| GlutaMAX™                     | Thermo Fisher Scientific | Cat# 35050061 | 100X                  | 1X                  |
| MEM Non-Essential Amino Acids | Thermo Fisher Scientific | Cat# 11140035 | 100X                  | 1X                  |

### i3N cortical neuron medium (CNM)

| ITEM                              | COMPANY                  | IDENTIFIER     | STORAGE CONCENTRATION | FINAL CONCENTRATION |
|-----------------------------------|--------------------------|----------------|-----------------------|---------------------|
| BrainPhys™ Neuronal Medium        | STEMCELL Technologies    | Cat# 5790      | basal medium          | basal medium        |
| B-27™ Supplement, minus vitamin A | Thermo Fisher Scientific | Cat# 12587-010 | 50X                   | 1X                  |
| BDNF                              | PeproTech                | Cat# 450-02    | 10 µg/mL              | 10 ng/mL            |
| NT3                               | PeproTech                | Cat# 450-03    | 10 µg/mL              | 10 ng/mL            |
| Laminin Mouse Protein             | Thermo Fisher Scientific | Cat# 23017015  | 1 mg/mL               | 1 µg/mL             |

### qPCR primers

| GENE         | NCBI ID | FORWARD SEQUENCE 5'-3' | REVERSE SEQUENCE 5'-3' |
|--------------|---------|------------------------|------------------------|
| <i>GAPDH</i> | 2597    | AGCCACATCGCTCAGACAC    | GCCCAATACGACCAAATCC    |
| <i>SORL1</i> | 6653    | CCAACCTGAAGATGGGTCATA  | ACAGCAGCAACATCCGTAGAT  |

### WB antibodies

| ANTIBODY            | DILUTION | COMPANY                   | IDENTIFIER                       |
|---------------------|----------|---------------------------|----------------------------------|
| β-Actin (8H10D10)   | 1:10,000 | Cell Signaling Technology | Cat# 3700; RRID: AB_2242334      |
| LR11 (SORLA)        | 1:4,000  | BD Biosciences            | Cat# 611861; RRID: AB_399341     |
| EEA1 (G-4)          | 1:500    | Santa Cruz Biotechnology  | Cat# sc-137130; RRID: AB_2246349 |
| Anti-mouse IgG, HRP | 1:3,000  | Cell Signaling Technology | Cat# 7076; RRID: AB_330924       |

**Jensen**  
**Supplementary Table S2**

| ID | Marker   | Genomic location |             | Distance to SORL1 (kb) | Heterozygosity | Family 3 proband |     | Family 1 proband |     | Family 2 proband |     | CON |     | CON |     | CON |     |
|----|----------|------------------|-------------|------------------------|----------------|------------------|-----|------------------|-----|------------------|-----|-----|-----|-----|-----|-----|-----|
|    |          | Start            | End         |                        |                |                  |     |                  |     |                  |     |     |     |     |     |     |     |
| 1  | D11S4127 | 117.644.118      | 117.644.500 | 3679                   | 0,72           | 94               | 102 | 100              | 100 | 96               | 98  | 96  | 100 | 92  | 100 | 96  | 98  |
| 2  | D11S924  | 119.437.791      | 119.438.160 | 1885                   | 0,70           | 248              | 250 | 250              | 250 | 246              | 246 | 246 | 246 | 250 | 254 | 248 | 250 |
| 3  | D11S925  | 120.828.211      | 120.828.546 | 495                    | 0,85           | 174              | 199 | 174              | 197 | 174              | 195 | 174 | 174 | 174 | 193 | 174 | 193 |
|    | SORL1    | 121.322.912      | 121.504.471 |                        |                | SORL1            |     |                  |     |                  |     |     |     |     |     |     |     |
| 4  | D11S1377 | 122.451.716      | 122.451.852 | 829                    | 0,78           | 229              | 235 | 223              | 231 | 231              | 231 | 233 | 237 | 229 | 231 | 229 | 231 |
| 5  | D11S933  | 124.671.980      | 124.672.327 | 3349                   | 0,80           | 413              | 423 | 417              | 421 | 413              | 421 | 413 | 427 | 421 | 423 | 423 | 423 |
| 6  | D11S975  | 125.828.395      | 125.828.653 | 4505                   | 0,79           | 223              | 225 | 223              | 233 | 223              | 233 | 223 | 223 | 233 | 237 | 223 | 233 |
| 7  | D11S4110 | 126.971.669      | 126.971.788 | 5649                   | 0,71           | 343              | 343 | 343              | 353 | 343              | 343 | 349 | 353 | 343 | 351 | 351 | 353 |

**Jensen**  
**Supplementary Figure S1**

**A**

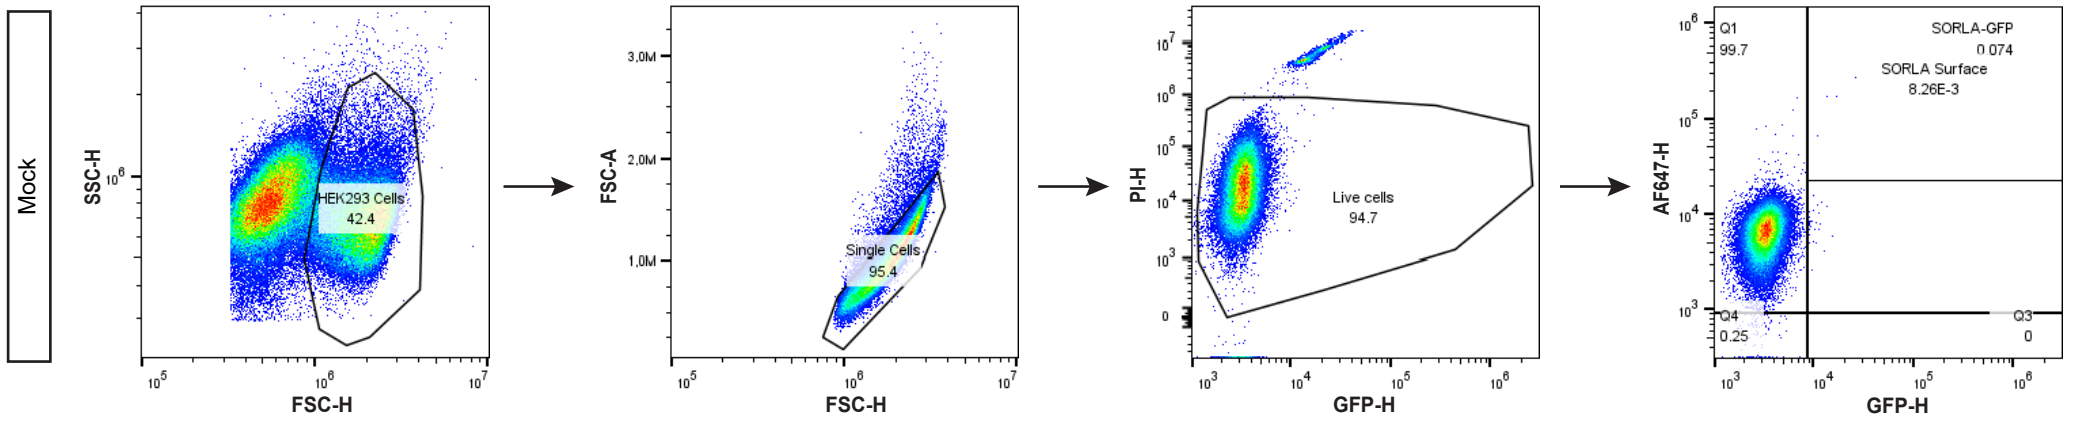

**B**

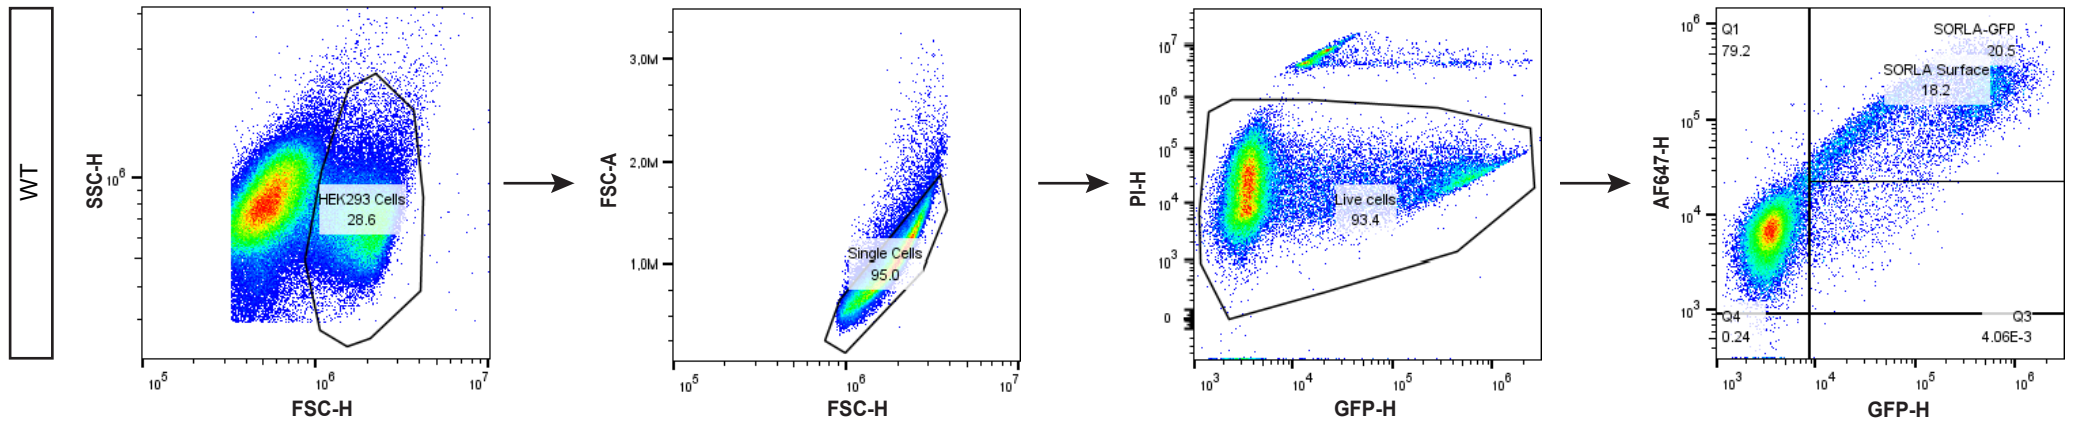

**C**

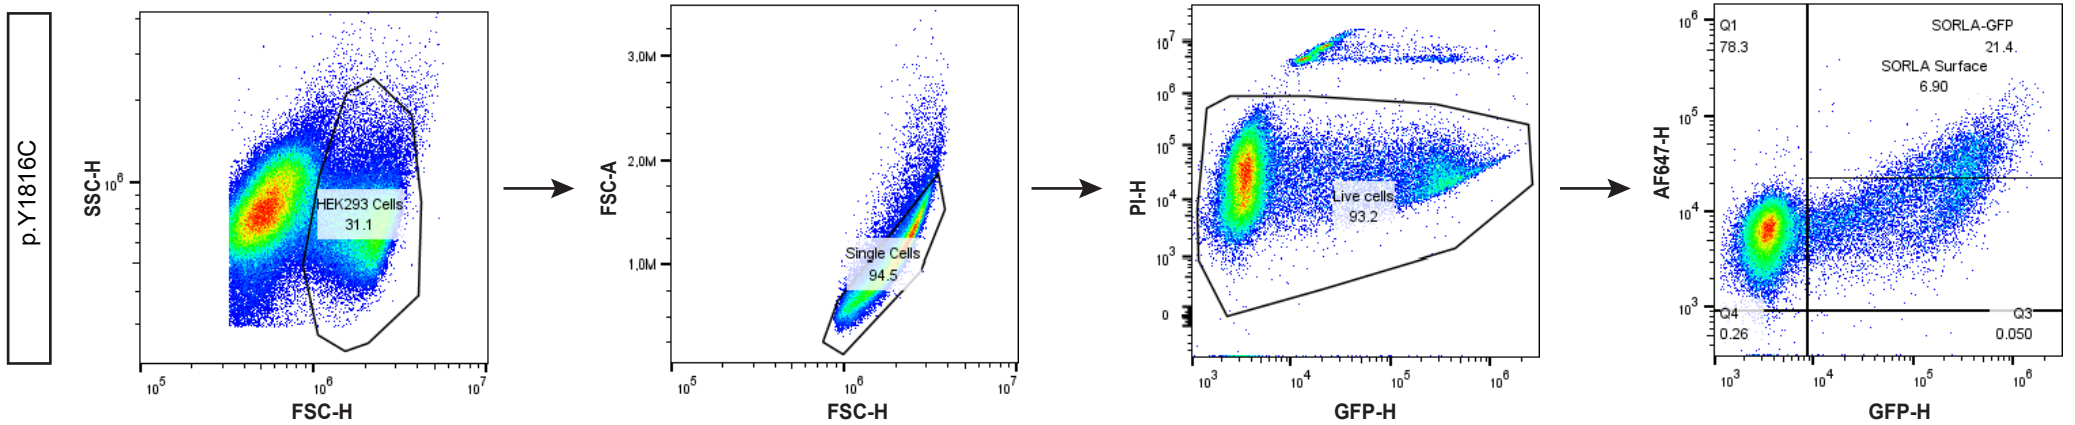

**Jensen**  
**Supplementary Figure S2**

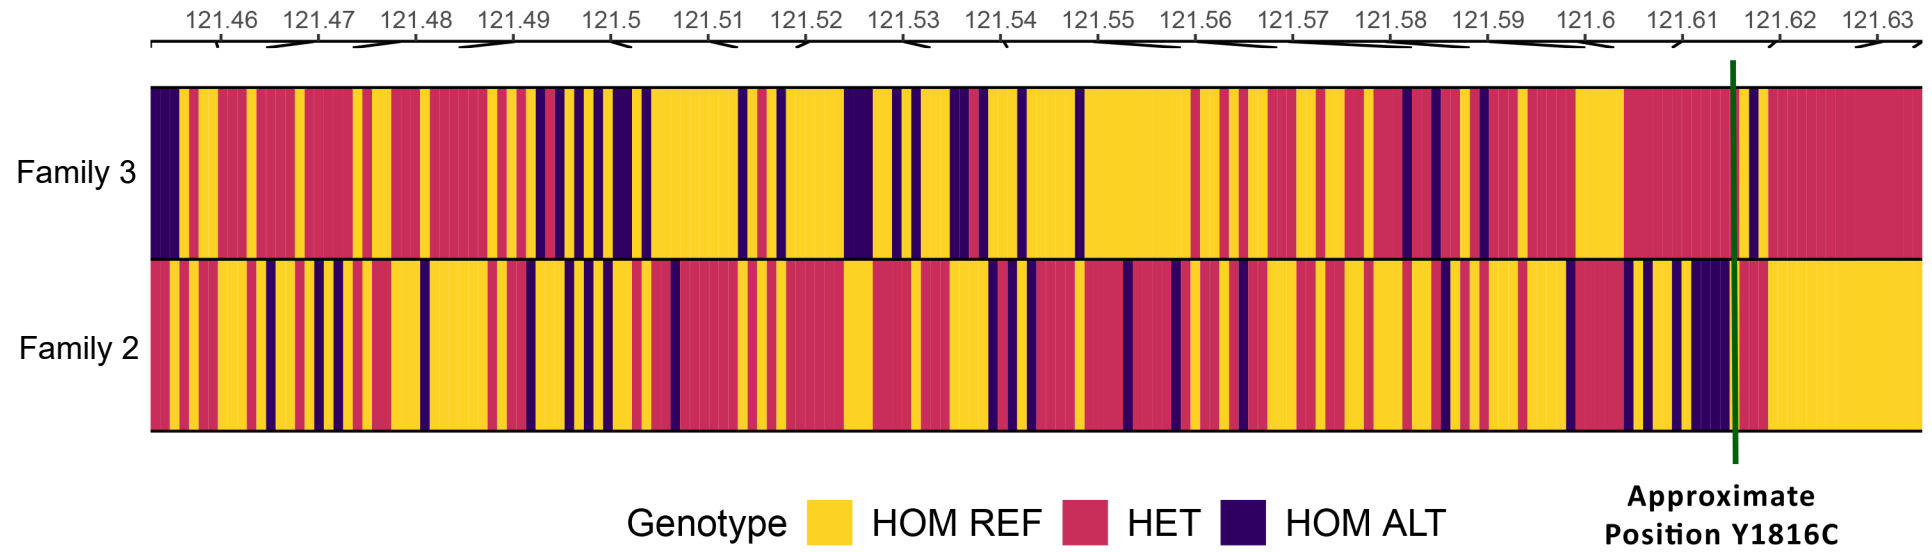

Supplement: Supplementary file [file media-1.pdf]
